# Supplementary material for: Photophysical and DFT studies on cycloplatinated complexes: modification in luminescence properties by expanding of π-conjugated systems
Source: Royal Society of Chemistry journal article supplement (doi:10.1039/c5ra10922a), 2015-01-01
Supplement: c5ra10922a1.pdf [file c5ra10922a1.pdf]

## Supporting Information

### Photophysical and DFT studies on cycloplatinated complexes: modification in luminescence properties by expanding of $\pi$ -conjugated system

*Mahboubeh Jamshidi, S. Masoud Nabavizadeh, Hamid R. Shamsavari and Mehdi Rashidi*

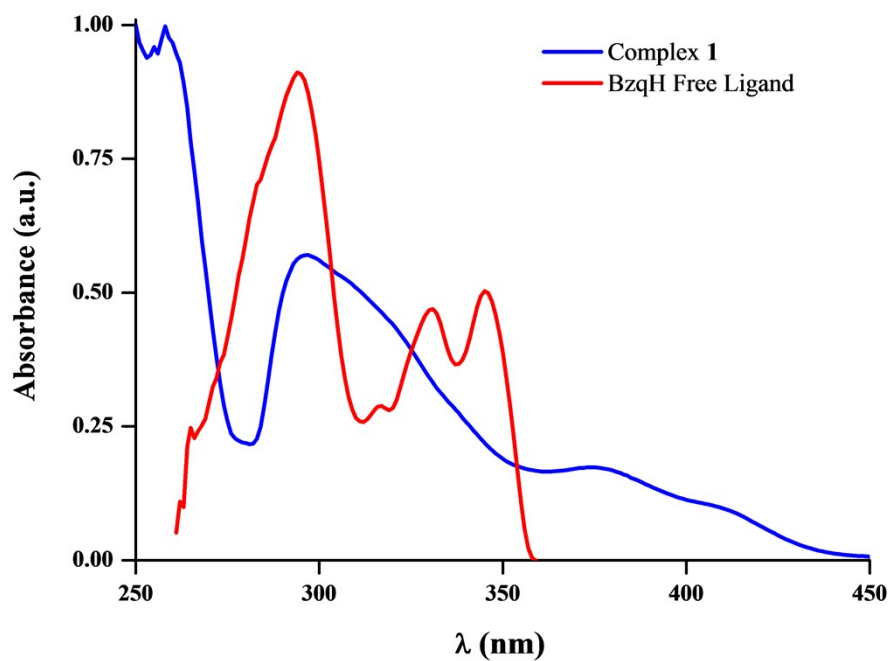

**Figure S1.** Normalized UV-vis spectra of the complex **1** and free bzqH compound in CH<sub>2</sub>Cl<sub>2</sub>.

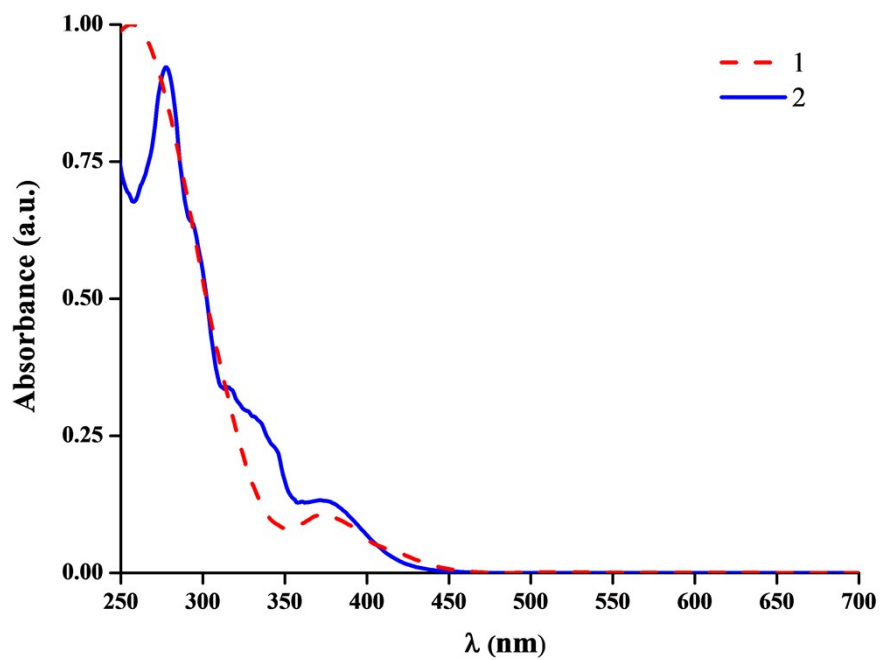

**Figure S2.** Normalized UV-vis spectra of the complexes **1** and **2** in 2-MeTHF ( $5 \times 10^{-5} \text{ M}$ )

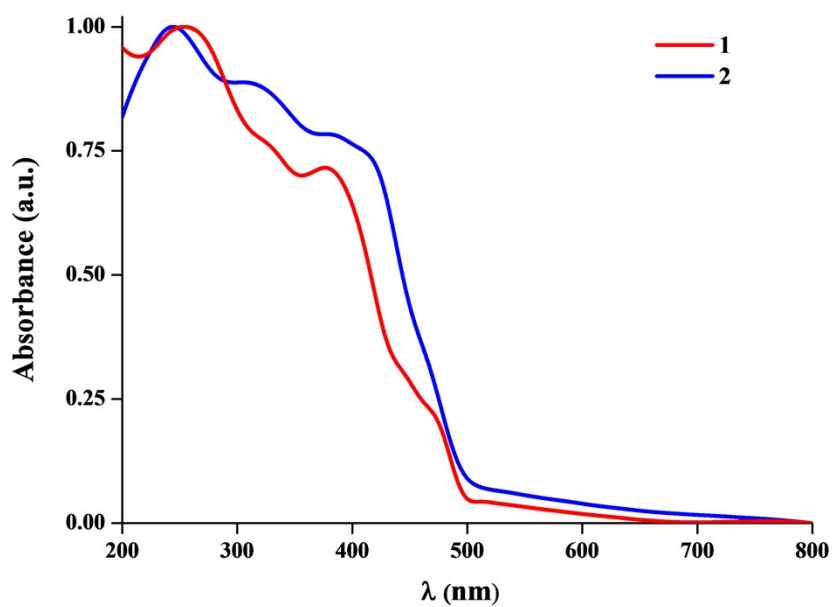

**Figure S3.** Normalized diffuse reflectance UV-vis spectra of the complexes **1** and **2** in solid state.

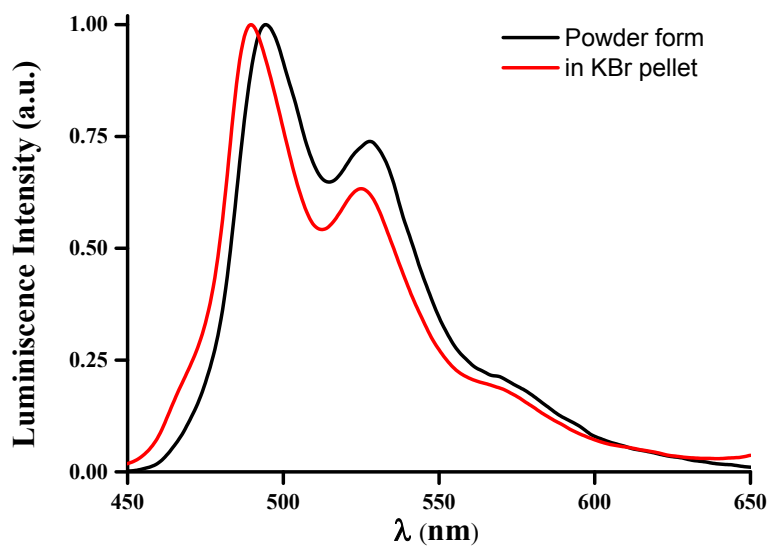

**Figure S4.** Normalized emission spectra of the complex **1** in solid state at different form.

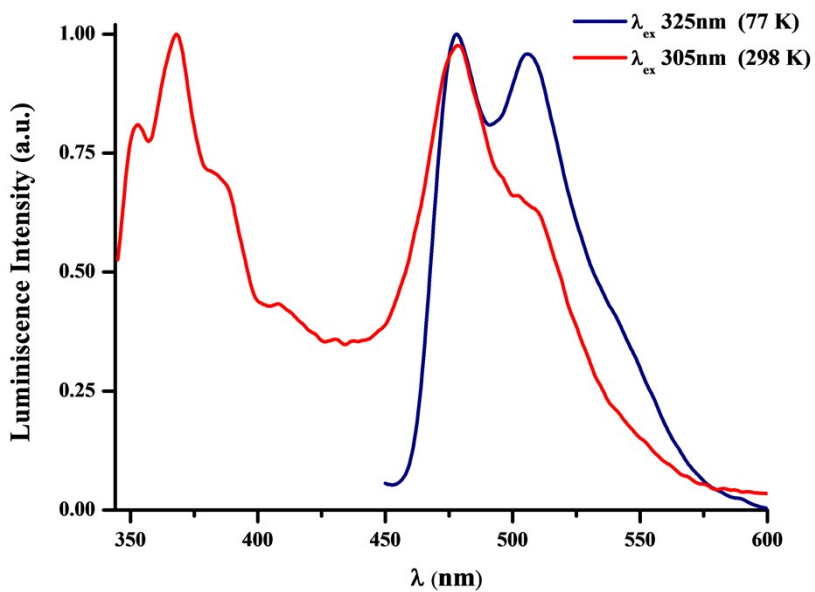

**Figure S5.** Normalized emission spectra of the complex **1** in  $\text{CH}_2\text{Cl}_2$  solution ( $5 \times 10^{-5}$  M) at 298 and 77 K.

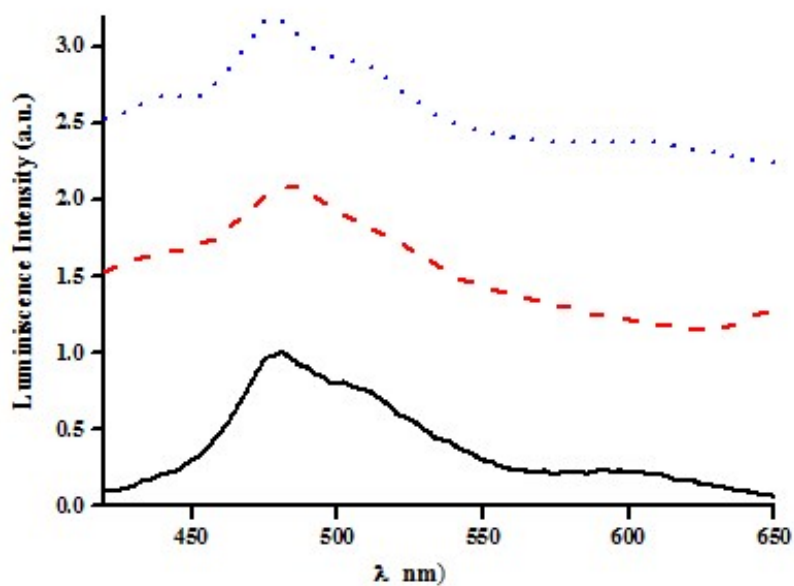

**Figure S6.** Normalized emission spectra of complex **1** in  $\text{CH}_2\text{Cl}_2$  at 298 K at several concentrations ( $10^{-3}\text{M}$ , solid line;  $10^{-4}\text{M}$ , dashed line and  $5 \times 10^{-5}\text{M}$ , dotted line).

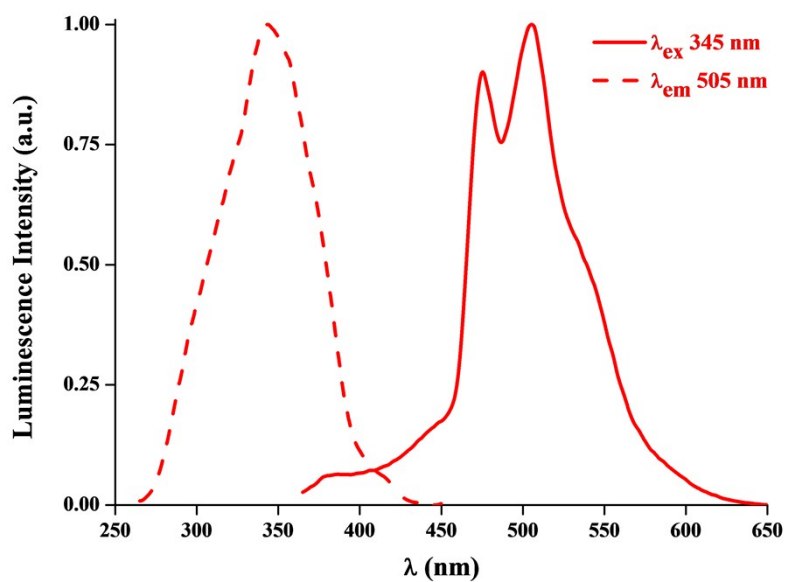

**Figure S7.** Normalized excitation (dotted lines) and emission spectra (solid lines) of the complex **2** in  $\text{CH}_2\text{Cl}_2$  solution ( $10^{-3}\text{M}$ ) at 298 K.

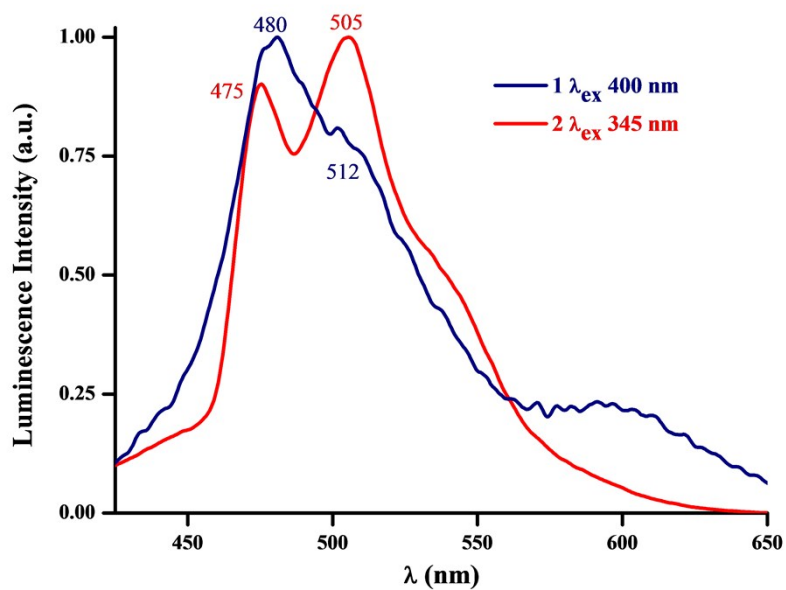

**Figure S8.** Normalized emission spectra of the complexes **1** and **2** in  $\text{CH}_2\text{Cl}_2$  solution ( $10^{-3}$  M) at 298 K.

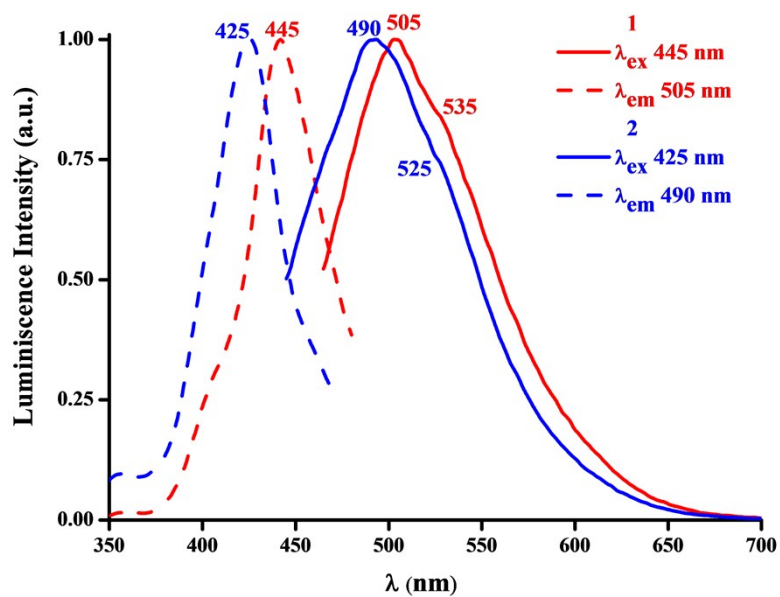

**Figure S9.** Normalized excitation spectra (dotted lines) and emission spectra (solid lines) of the complexes **1** and **2** in 2-MeTHF solution ( $5 \times 10^{-5}$  M) at 298 K.

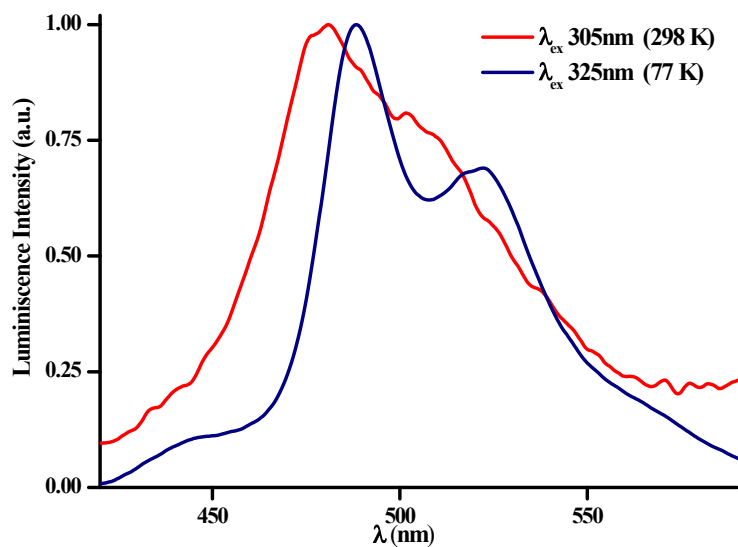

**Figure S10.** Normalized emission spectra of the complex **1** in CH<sub>2</sub>Cl<sub>2</sub> solution (10<sup>-3</sup> M) at 298 and 77 K.

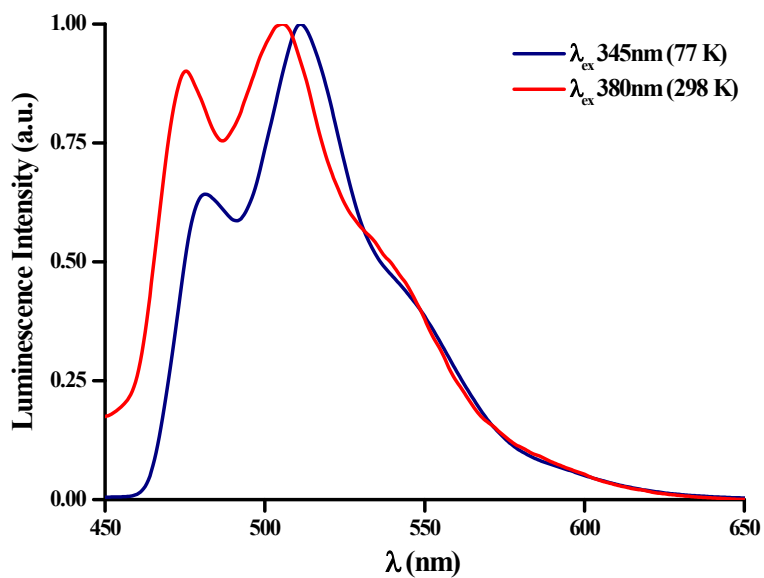

**Figure S11.** Normalized emission spectra of the complex **2** in CH<sub>2</sub>Cl<sub>2</sub> solution (10<sup>-3</sup> M) at 298 and 77 K.

**Table S1.** Composition (%) of frontier MOs in the ground state ( $S_0$ ) for the complex **1**, [Pt( $p$ -MeC<sub>6</sub>H<sub>4</sub>)(bzq)(SMe<sub>2</sub>)], in gas phase

| MO orbitals | Pt | SMe <sub>2</sub> | bzq | $p$ -MeC <sub>6</sub> H <sub>4</sub> |
|-------------|----|------------------|-----|--------------------------------------|
| L + 5       | 19 | 17               | 23  | 42                                   |
| L + 4       | 1  | 4                | 7   | 88                                   |
| L + 3       | 13 | 58               | 22  | 7                                    |
| L + 2       | 5  | 12               | 76  | 6                                    |
| L + 1       | 2  | 8                | 88  | 2                                    |
| LUMO        | 2  | 1                | 95  | 2                                    |
| HOMO        | 27 | 3                | 5   | 65                                   |
| H - 1       | 31 | 3                | 65  | 2                                    |
| H - 2       | 80 | 1                | 10  | 9                                    |
| H - 3       | 54 | 0                | 34  | 12                                   |
| H - 4       | 15 | 1                | 2   | 81                                   |
| H - 5       | 38 | 0                | 57  | 5                                    |
| H - 6       | 45 | 2                | 52  | 1                                    |

**Table S2.** Composition (%) of frontier MOs in ground state ( $S_0$ ) for complex **2**, [Pt( $p$ -MeC<sub>6</sub>H<sub>4</sub>)(ppy)(SMe<sub>2</sub>)], in gas phase.

| MO orbitals | Pt | SMe <sub>2</sub> | ppy | $p$ -MeC <sub>6</sub> H <sub>4</sub> |
|-------------|----|------------------|-----|--------------------------------------|
| L + 6       | 29 | 17               | 31  | 23                                   |
| L + 5       | 11 | 41               | 40  | 8                                    |
| L + 4       | 18 | 19               | 17  | 46                                   |
| L + 3       | 3  | 5                | 7   | 85                                   |
| L + 2       | 12 | 52               | 27  | 9                                    |
| L + 1       | 1  | 2                | 97  | 0                                    |
| LUMO        | 6  | 2                | 89  | 3                                    |
| HOMO        | 27 | 3                | 5   | 65                                   |
| H - 1       | 42 | 3                | 54  | 1                                    |
| H - 2       | 81 | 1                | 9   | 9                                    |
| H - 3       | 52 | 0                | 35  | 12                                   |
| H - 4       | 16 | 1                | 2   | 80                                   |
| H - 5       | 38 | 0                | 56  | 6                                    |
